# Supplementary material for: Higher expression of cell division cycle-associated protein 5 predicts poorer survival outcomes in hepatocellular carcinoma
Source: publisher site journal article supplement (doi:10.18632/aging.103501), 2020-07-21
Supplement: Supplementary file [file aging-v12i14-103501-supplementary-material-SD1.pdf]

**SUPPLEMENTARY FIGURES**

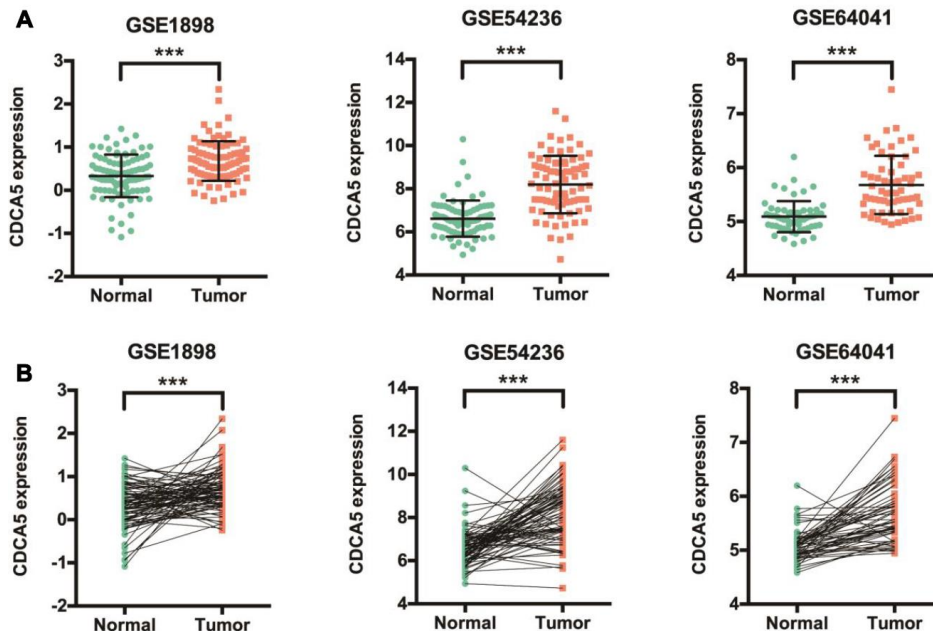

**Supplementary Figure 1. The relative mRNA expression of CDCA5 in GEO datasets.** (A) The relative mRNA level of CDCA5 is significantly higher in HCC tissues than in adjacent normal tissue. Data represent the mean  $\pm$  SD. \*\*\*,  $P < 0.001$ . (B) The relative mRNA level of CDCA5 is higher in HCC than patient-matched adjacent normal tissues. \*\*\*,  $P < 0.001$ .

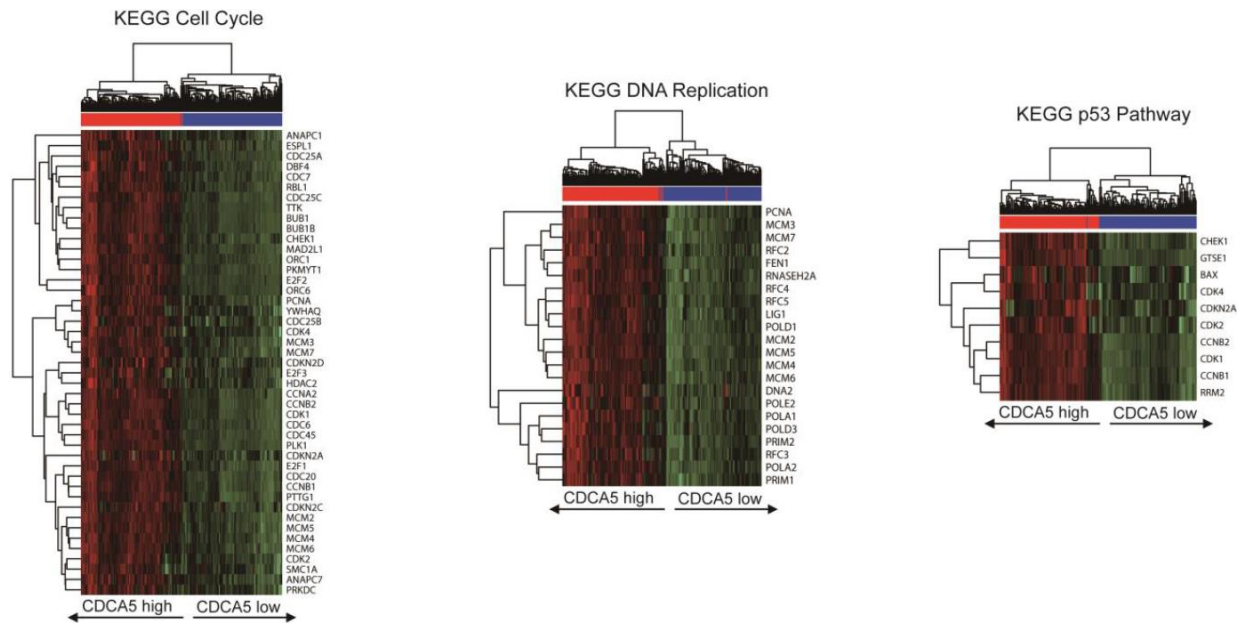

**Supplementary Figure 2. Enrichment clustering of genes involved in cell cycle, DNA replication and p53 pathway between CDCA5-high and -low patients.**
